# Supplementary material for: Technical note: First comparison of wind observations from ESA's satellite mission Aeolus and ground-based radar wind profiler network of China
Source: Copernicus journal article supplement (doi:10.5194/acp-21-2945-2021), 2021-02-26
Supplement: Supplementary file 1 [file acp-21-2945-2021-supplement.pdf]

Supplement of Atmos. Chem. Phys., 21, 2945–2958, 2021  
<https://doi.org/10.5194/acp-21-2945-2021-supplement>  
© Author(s) 2021. This work is distributed under  
the Creative Commons Attribution 4.0 License.

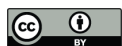

*Supplement of*

**Technical note: First comparison of wind observations from ESA's satellite mission Aeolus and ground-based radar wind profiler network of China**

**Jianping Guo et al.**

*Correspondence to:* Boming Liu (liuboming@whu.edu.cn)

The copyright of individual parts of the supplement might differ from the CC BY 4.0 License.

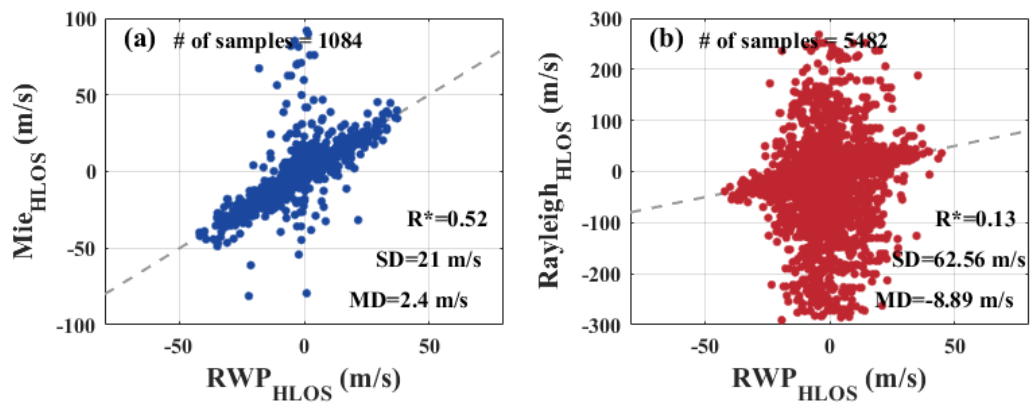

**Figure S1.** Aeolus against RWP HLOS winds for (a) Mie-cloudy winds and (d) Rayleigh-clear winds for all data.

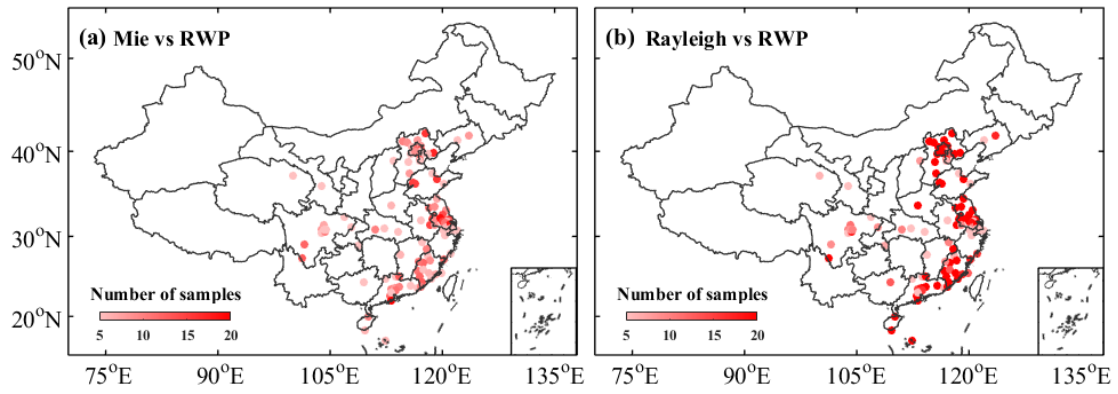

**Figure S2.** Spatial distribution of the number of paired data samples between Aeolus HLOS and RWP HLOS wind speeds at each RWP site. The wind measurements are separated in (a) Mie-cloudy winds and (b) Rayleigh-clear winds.
